# Supplementary material for: Charge Transport in Organic Semiconducting Crystals Exhibiting TADF: Insight from Quantum Chemical Calculations
Source: MDPI journal article supplement (doi:10.3390/cryst13010055), 2022-12-28
Supplement: s1 [file s1]

## Charge transport in organic semiconducting crystals exhibiting TADF: insight from quantum-chemical calculations

Andrey Yu. Sosorev<sup>1,2\*</sup>, Dmitry I. Dominskiy<sup>1,2</sup>, Nikita O. Dubinets<sup>1,3</sup>

1. Enikolopov Institute of Synthetic Polymeric Materials, Russian Academy of Science, Profsoyuznaya 70, Moscow 117393, Russia
2. Faculty of Physics and International Laser Center, Lomonosov Moscow State University, Leninskie Gory 1/62, Moscow 119991, Russia
3. Photochemistry Center, FSRC Crystallography and Photonics, Russian Academy of Sciences, Novatorov Str. 7A-1, Moscow, 119421, Russia

\* Correspondence: sosorev@physics.msu.ru

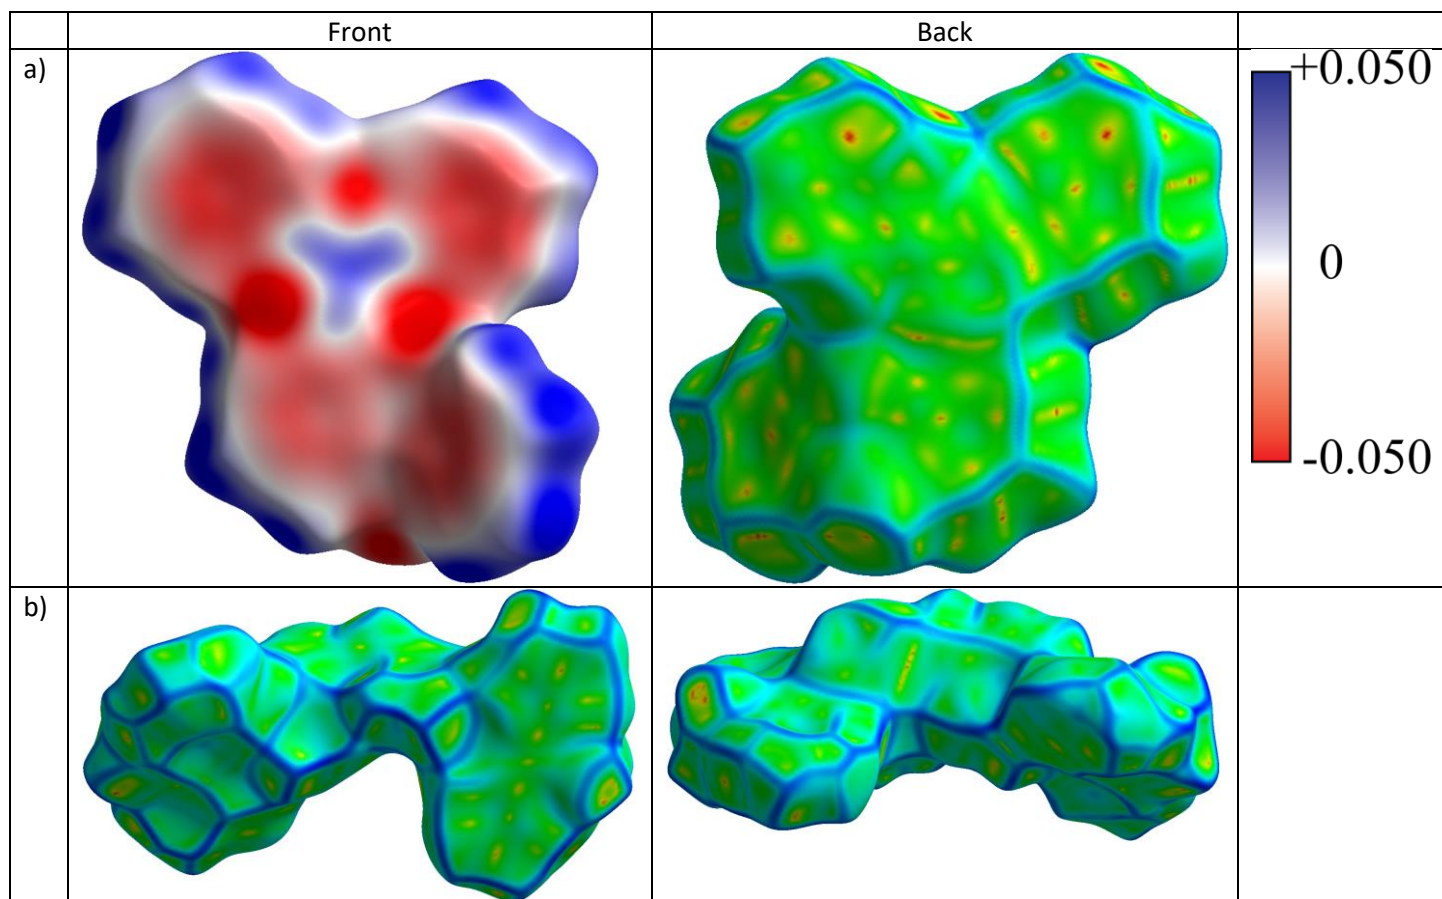

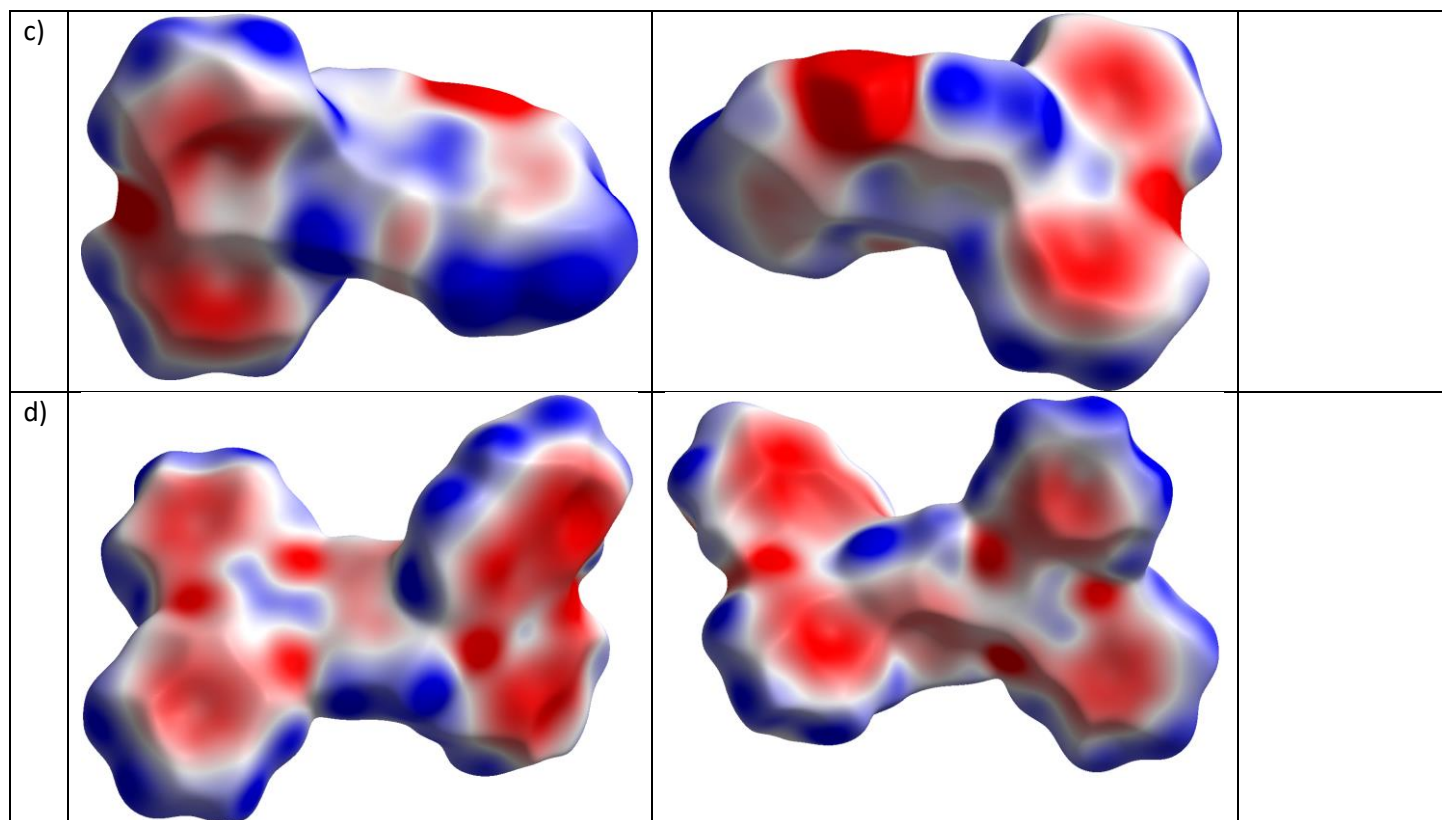

Figure S1. Hirshfeld surfaces (front and back of the molecules) mapped with electrostatic potential for crystalline oTE-DRZ (a), CPPD (b), PXZ-XO (c) and TRZ-c-BPXZ (d).

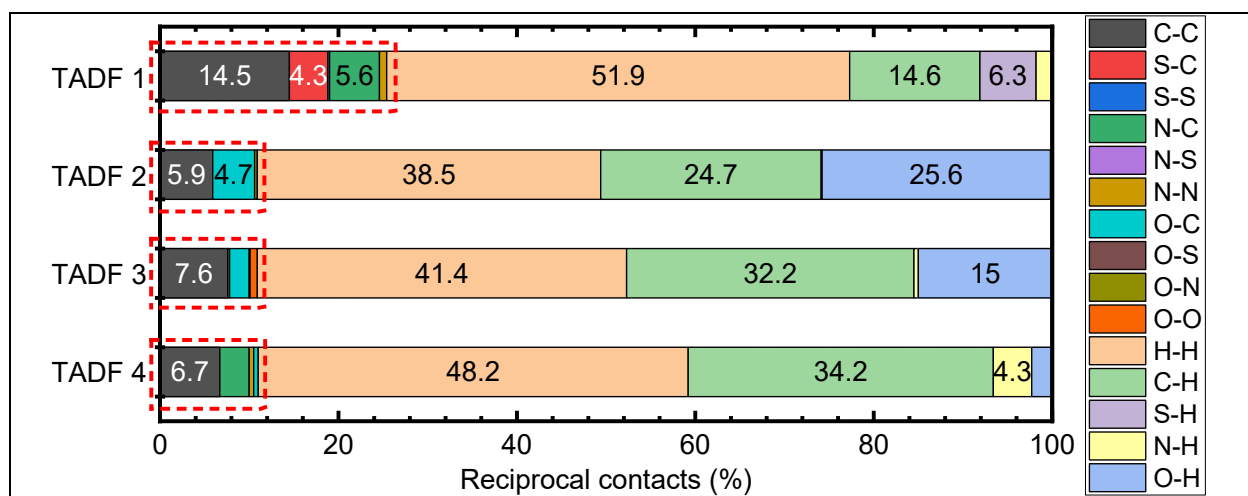

Figure S2. Distribution of reciprocal intermolecular contacts for oTE-DRZ, CPPD, PXZ-XO and TRZ-c-BPXZ crystals. "Conducting" contacts (*i.e.*, the contacts between the atoms bearing large HOMO and/or LUMO electron density) are highlighted with the red dashed frames.

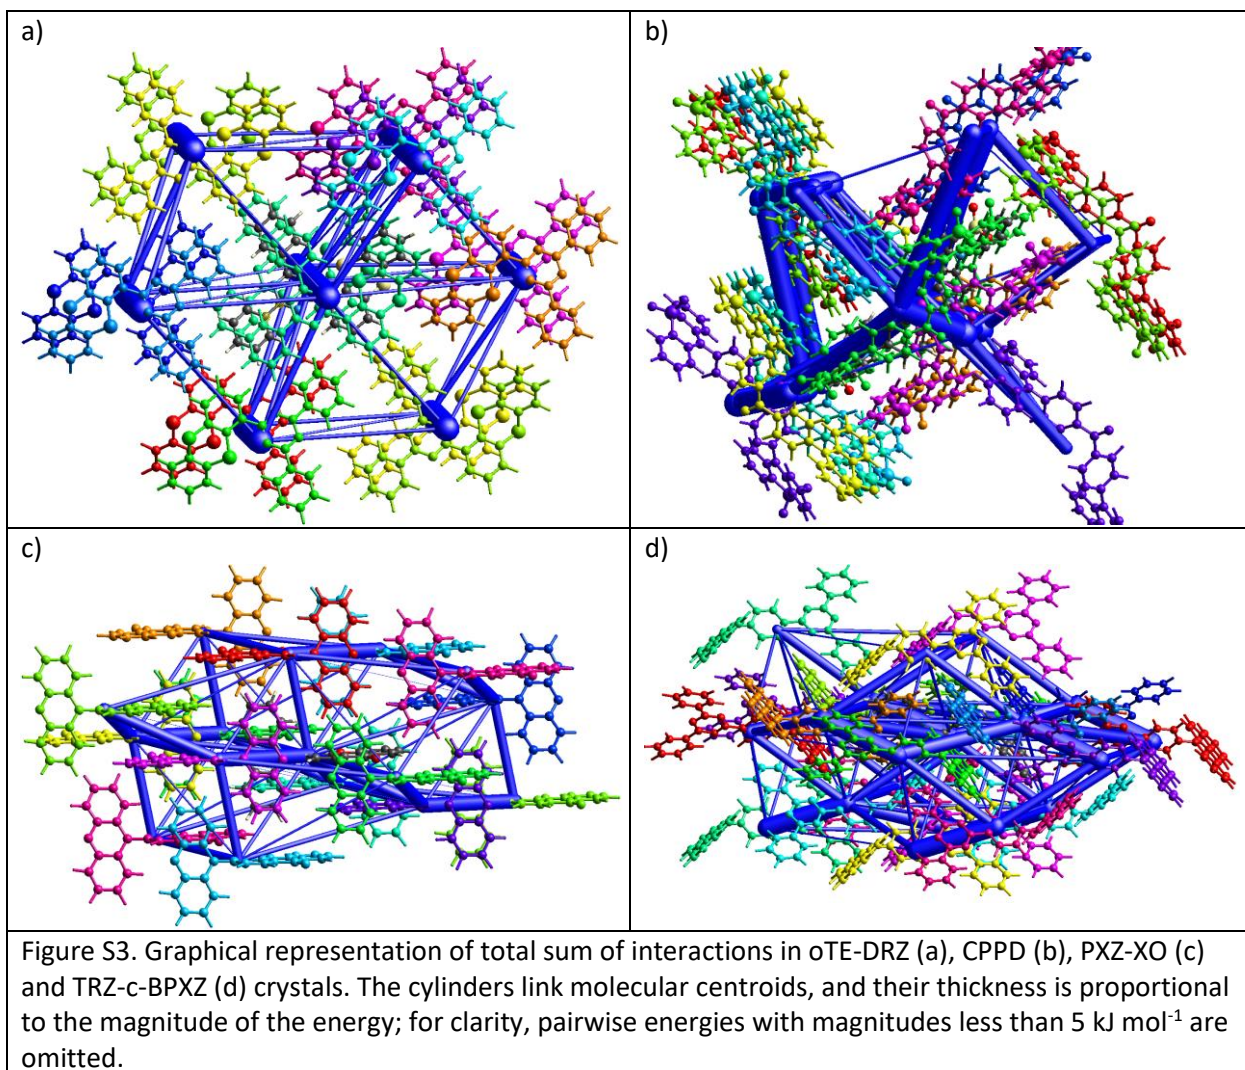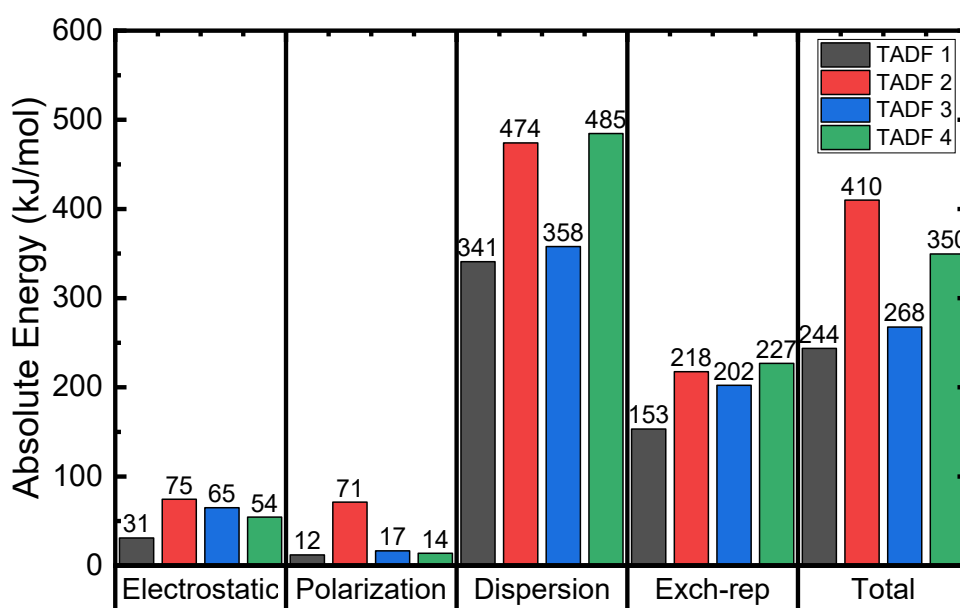

Figure S4. Distribution of sum of interaction energies (absolute values) in oTE-DRZ, CPPD, PXZ-CMO and TRZ-c-BPXZ for 3.8Å cluster.

Table S1. Different interaction energies of the molecular pairs for oTE-DRZ in kJ mol<sup>-1</sup>: N is the number of pairs, R is the distance between the molecule centroids, E\_ele is the classical electrostatic energy of interaction between monomer charge distributions, E\_pol is the polarization energy estimated as a sum over atoms with terms of the kind  $-\frac{1}{2}\alpha|\mathbf{F}|^2$ , where the electric field F is computed at each atomic nucleus from the charge distribution of the other monomer and  $\alpha$  are isotropic atomic polarizabilities, E\_dis is Grimme's D2 dispersion correction summed over all intermolecular atom pairs, E\_rep is the exchange–repulsion energy, obtained from the antisymmetric product of the monomer spin orbitals, and E\_tot is the total energy.

|  | N | R (Å) | E_ele | E_pol | E_dis  | E_rep | E_tot |
|--|---|-------|-------|-------|--------|-------|-------|
|  | 1 | 11.31 | -6.8  | -0.9  | -32.0  | 17.1  | -25.1 |
|  | 0 | 13.81 | 1.4   | -1.0  | -17.2  | 0.0   | -14.2 |
|  | 1 | 12.44 | -1.1  | -0.4  | -12.1  | 0.0   | -11.9 |
|  | 0 | 13.81 | 0.8   | -0.3  | -7.1   | 0.0   | -5.6  |
|  | 1 | 12.38 | -0.5  | -0.8  | -21.6  | 0.0   | -20.0 |
|  | 1 | 3.98  | -13.0 | -5.3  | -151.4 | 96.9  | -89.7 |
|  | 0 | 11.88 | -1.5  | -0.4  | -10.5  | 5.6   | -7.5  |
|  | 0 | 14.10 | -0.6  | -0.2  | -9.3   | 0.0   | -8.9  |
|  | 1 | 13.91 | 1.2   | -0.6  | -17.6  | 0.0   | -14.5 |
|  | 0 | 10.99 | -6.5  | -0.8  | -30.1  | 19.9  | -21.4 |
|  | 0 | 13.50 | -0.4  | -0.6  | -11.8  | 0.0   | -11.1 |
|  | 0 | 11.50 | -4.0  | -0.7  | -20.2  | 13.7  | -13.8 |

Table S2. Different interaction energies of the molecular pairs for CPPD in kJ mol<sup>-1</sup>.

|  | N | R (Å) | E_ele | E_pol | E_dis  | E_rep | E_tot |
|--|---|-------|-------|-------|--------|-------|-------|
|  | 2 | 15.95 | 1.7   | -0.3  | -3.3   | 0     | -1.3  |
|  | 1 | 6.80  | -19.1 | -13   | -88.5  | 54    | -73.5 |
|  | 2 | 11.14 | -5.5  | -3.4  | -29.1  | 21.2  | -20.5 |
|  | 2 | 12.99 | 18.3  | -4    | -27.1  | 0     | -7.1  |
|  | 2 | 8.62  | -6.4  | -4.6  | -35.6  | 15    | -31.8 |
|  | 2 | 11.36 | -25.5 | -9.4  | -40.1  | 33    | -48.4 |
|  | 2 | 16.81 | -1    | -0.5  | -4.9   | 0     | -5.8  |
|  | 1 | 14.18 | -3.9  | -10.4 | -66.5  | 0     | -69.8 |
|  | 2 | 14.46 | -13.6 | -3.2  | -11.5  | 0     | -26.8 |
|  | 1 | 5.47  | -7.6  | -17.6 | -151.9 | 94.4  | -95.1 |
|  | 1 | 18.53 | -11.9 | -4.9  | -15.6  | 0     | -29.8 |

Table S3. Different interaction energies of the molecular pairs for PXZ-XO in kJ mol<sup>-1</sup>.

|  | N | R (Å) | E_ele | E_pol | E_dis | E_rep | E_tot |
|--|---|-------|-------|-------|-------|-------|-------|
|  | 1 | 7.27  | -9.7  | -1    | -46.8 | 29    | -33.8 |
|  | 1 | 11.91 | -1.6  | -0.2  | -8.1  | 2.8   | -7.2  |
|  | 1 | 12.61 | 0.3   | -0.7  | -22.3 | 0     | -19.6 |



|   |       |       |      |       |      |       |
|---|-------|-------|------|-------|------|-------|
| 2 | 16.27 | 0.2   | -0.1 | -2    | 0    | -1.6  |
| 2 | 7.69  | -11.5 | -3.6 | -30.4 | 21.2 | -28.1 |
| 1 | 6.51  | -15.9 | -3   | -61.9 | 43.7 | -45.9 |
| 2 | 9.84  | -2.7  | -0.3 | -20.6 | 11.6 | -13.9 |
| 1 | 14.58 | -3.3  | -0.4 | -15.3 | 0    | -17.1 |
| 1 | 8.74  | -7.4  | -2.7 | -66.9 | 46.6 | -39.4 |
| 1 | 8.52  | -13.4 | -3.5 | -74.9 | 47.3 | -52.7 |
| 2 | 12.38 | 0     | -1.1 | -8.7  | 0    | -8.3  |

Table S4. Different interaction energies of the molecular pairs for TRZ-c-BPXZ in  $\text{kJ mol}^{-1}$ .

|  | N | R (Å) | E_ele | E_pol | E_dis  | E_rep | E_tot |
|--|---|-------|-------|-------|--------|-------|-------|
|  | 2 | 16.52 | 0.2   | -0.7  | -19.1  | 0     | -16.9 |
|  | 1 | 14.46 | 3.3   | -1.4  | -58.7  | 0     | -48.6 |
|  | 2 | 11.76 | -3.5  | -0.7  | -17.8  | 10.3  | -13.4 |
|  | 1 | 7.12  | -12.1 | -2.1  | -119.2 | 63.5  | -79   |
|  | 2 | 11.28 | -7.9  | -0.9  | -34.9  | 20.8  | -26.6 |
|  | 2 | 16.85 | 0.8   | -0.2  | -5.9   | 0     | -4.5  |
|  | 2 | 10.02 | -11.1 | -1.6  | -57.4  | 37.7  | -39.6 |
|  | 1 | 9.12  | -7    | -1.4  | -44.5  | 28.1  | -29.7 |
|  | 1 | 10.71 | -11.6 | -3.6  | -86.1  | 45.9  | -61.5 |
|  | 2 | 14.51 | 1.2   | -0.3  | -9.9   | 0     | -7.5  |
|  | 2 | 8.65  | -4.4  | -0.6  | -21.9  | 16.7  | -13.9 |
|  | 2 | 11.52 | -2.3  | -0.4  | -9.3   | 3.9   | -8.4  |

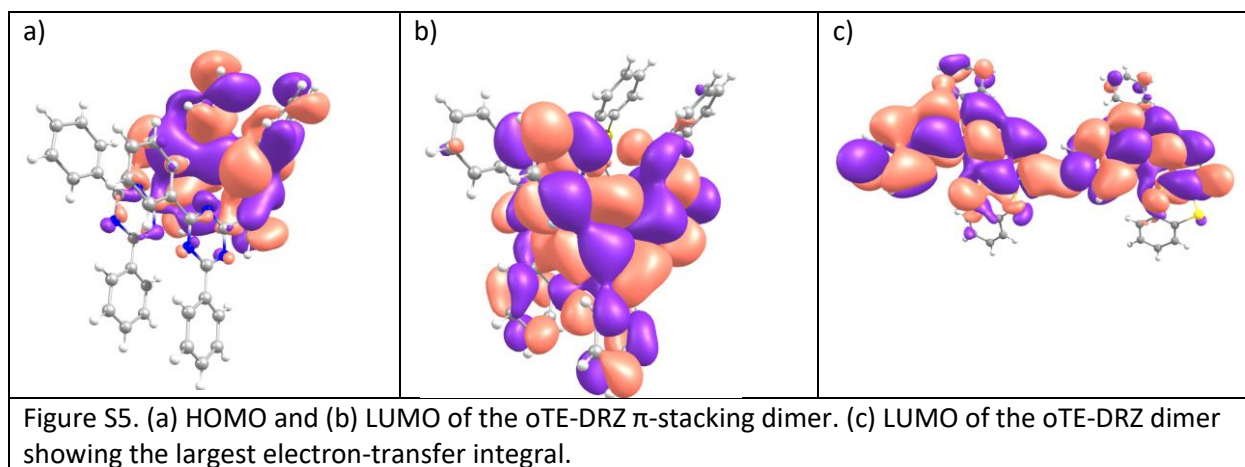

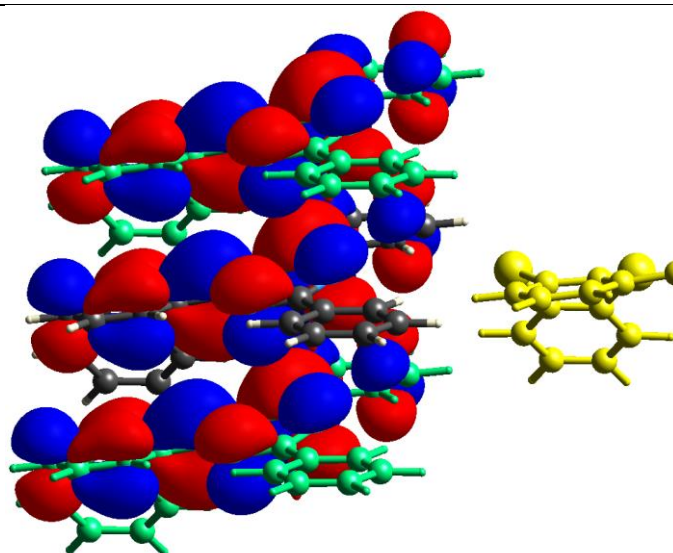

Figure S6. LUMO of the oTE-DRZ  $\pi$ -stack. Wavefunction phase mismatch between adjacent molecules is clearly observed.
